# Supplementary material
Source: PubMed Central journal article supplement (PMC2714941)
Supplement: tpc.108.064022_1.pdf [file tpc.108.064022_1.pdf]

Supplemental Data. Penfield and Hall (2009). A role for multiple circadian clock genes in the response to signals that break seed dormancy in Arabidopsis.

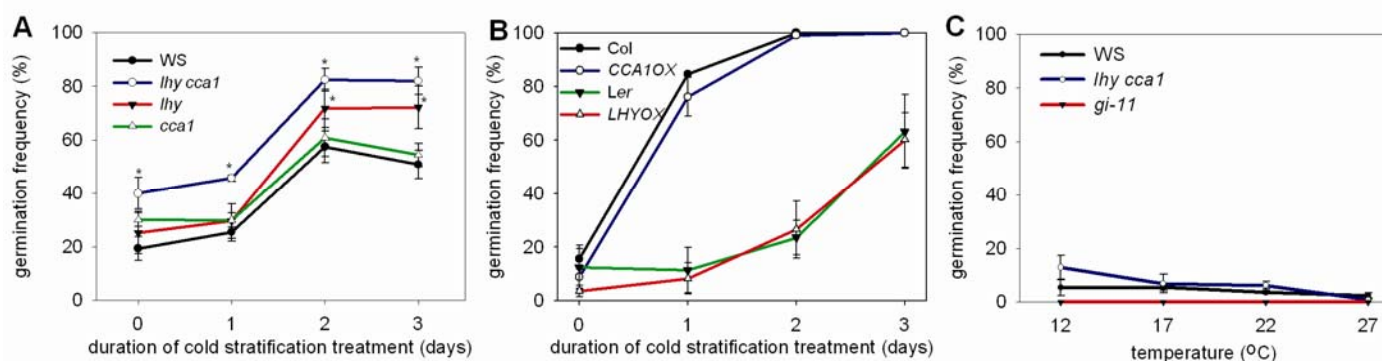

**Supplemental Figure 1. A, B. The germination after 7 days of freshly harvested seeds in response to cold stratification. (A)** *lhy* and *cca1* single mutants, compared to the *lhy cca1* double mutant, and **(B)** *LHY* and *CCA1* overexpressing seeds. **(C)** The germination of freshly harvested WS, *lhy cca1* and *gi-11* seeds at four constant temperatures. The germination of all genotypes is poor at harvest indicating strong dormancy. Data represents the mean and standard error of 5 independent seed batches. Asterisks indicate significant differences from wild type ( $P < 0.05$ ).

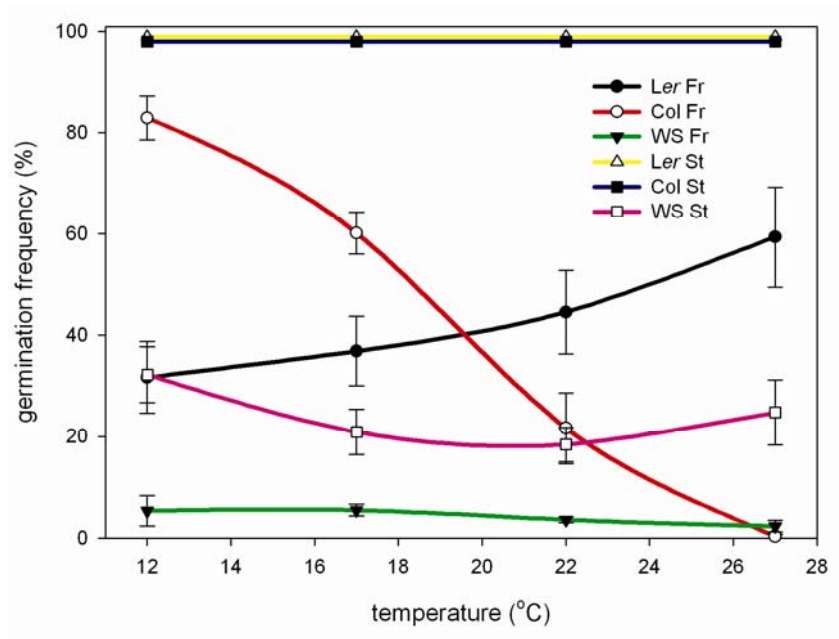

**Supplemental Figure 2. The germination frequency of freshly harvested (Fr) and 3 month after-ripened (St) wild type seeds from 12 to 27°C after 7 days.** Data represents the mean and standard error of 5 independent seed batches. The genetic basis of these differences is largely unknown.

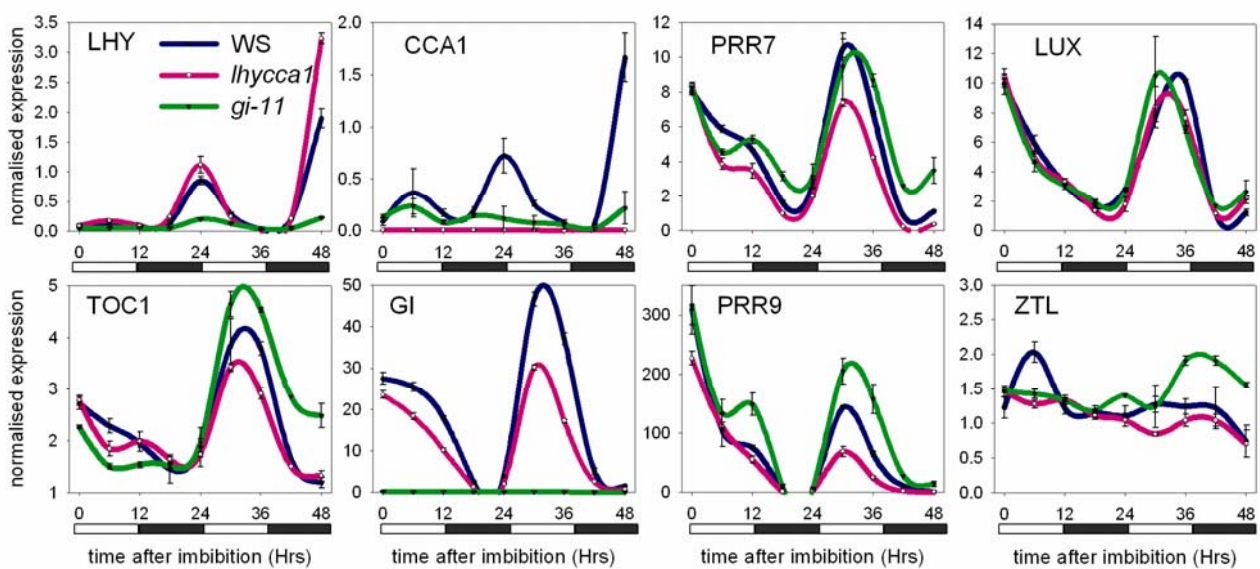

**Supplemental Figure 3.** The expression of genes encoding Arabidopsis circadian clock components under diurnal light/ dark cycles in imbibed 3 month after-ripened seeds in WS (blue) *gi-11* (green) and *lhycca1* (pink) during the first 48 hours of imbibition. Data represents the mean and standard error of two biological replicates.

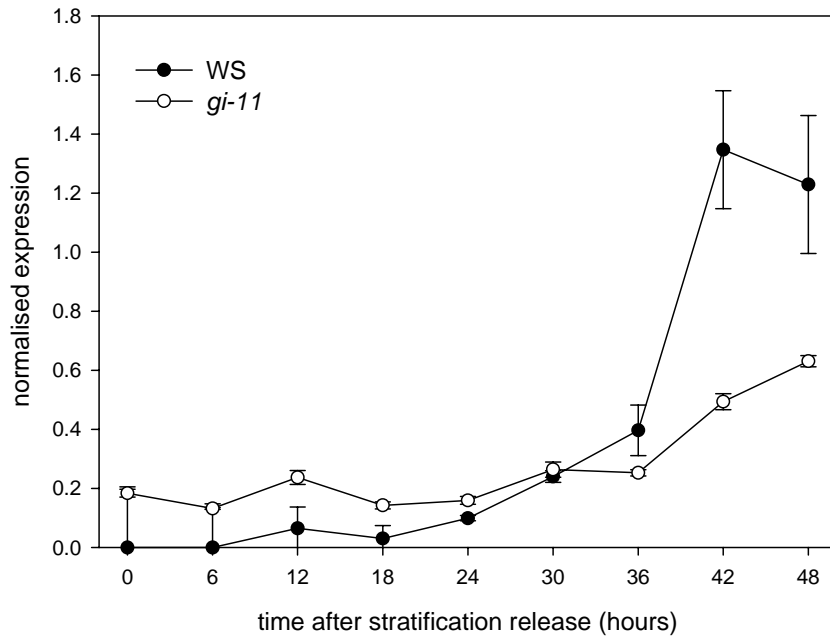

**Supplemental Figure 4. Real time RT-PCR to show the expression of *GA3OX1* after the release of freshly harvested wild type WS and the cold stratification non-responsive *gi-11* mutant seeds into ambient temperatures from 3 days cold stratification at 4°C. Data points represent the mean and standard deviation of two biological replicates.**

| AGI NUMBER | GENE NAME | EXPERIMENT |        |        |        |        |        |        |        | PDD MEAN | NDD MEAN |
|------------|-----------|------------|--------|--------|--------|--------|--------|--------|--------|----------|----------|
|            |           | PDD1       | PDD2   | PDD3   | PDD4   | NDD1   | NDD2   | NDD3   | NDD4   |          |          |
| At5g61380  | TOC1      | 271.8      | 237.53 | 256.73 | 238.04 | 194.29 | 258.81 | 223.2  | 126.6  | 251.03   | 200.73   |
| At1g01060  | LHY       | 19.38*     | 13.99* | 5.88*  | 12.79* | 2.51*  | 37.11* | 4.52*  | 8.23*  | 13.01    | 13.09    |
| At2g46830  | CCA1      | 2.16*      | 13.82* | 2.93*  | 8.93*  | 4.77*  | 10.2*  | 1.19*  | 14.71* | 6.96     | 7.72     |
| At5g02810  | PRR7      | 158.01     | 182.34 | 164.75 | 201.55 | 103.57 | 107.41 | 99.2   | 66.11  | 176.66   | 94.07    |
| At1g22770  | GI        | 235.7      | 281.96 | 273.2  | 211.73 | 166.59 | 212.9  | 156.26 | 117.6  | 250.65   | 163.34   |
| At2g46790  | PRR9      | 124.61     | 126.02 | 112.18 | 141.14 | 86.68  | 131.81 | 80.46  | 120.35 | 125.99   | 104.83   |
| At3g46640  | LUX       | 217.56     | 235.72 | 236.56 | 225.65 | 337.25 | 274.71 | 315.37 | 507.5  | 228.87   | 358.71   |
| AT5G6010   | PRR3      | 283.29     | 282.88 | 230.71 | 267.61 | 439.60 | 446.69 | 302.10 | 441.19 | 266.12   | 407.40   |
| AT5G24470  | PRR5      | 8.99*      | 17.19* | 20.66* | 5.18*  | 1.5*   | 14.02* | 7.14*  | 2.07*  | 13.0     | 6.18     |
| AT2G25930  | ELF3      | 192.51     | 198.08 | 182.75 | 191.15 | 153.95 | 239.43 | 178.58 | 105.14 | 267.48   | 258.40   |
| AT2G40080  | ELF4      | 1397.0     | 1319.7 | 1108.5 | 1404.6 | 1312.4 | 697.28 | 1417.3 | 1617.4 | 1307.5   | 1261.0   |
| AT2G21660  | CCR2      | 179.94     | 168.17 | 177.82 | 167.58 | 480.17 | 278.61 | 525.71 | 556.82 | 173.28   | 460.32   |
| At1g20620  | CAT3      | 2756.7     | 2510.5 | 2824.3 | 1763.4 | 3932.9 | 5255.9 | 4437.4 | 4056.5 | 2713.7   | 4420.6   |
| At1g29920  | CAB2      | 2.18*      | 1.53*  | 5.04*  | 0.48*  | 10.07* | 1.53*  | 11.54* | 2.13*  | 2.31     | 6.31     |

\* indicates an absent call by MAS5.

**Supplemental Table 1. Microarray data showing expression of Arabidopsis circadian clock genes from freshly harvested dry seeds, and dry after-ripened dry seeds (PDD; primary dormant, fresh from the mother plant growing in the greenhouse in light/dark cycles; or NDD; seeds stored dry in the dark at 20°C for 1 year). Data taken from Finch-savage et al. (2007). Note that the morning-expressed (red) genes are called absent in both treatments.**

#### Supplemental Reference:

Finch-Savage, W.E., Cadman, C.S., Toorop, P.E., Lynn, J.R., Hilhorst, H.W. (2007) Seed dormancy release in Arabidopsis Cvi by dry after-ripening, low temperature, nitrate and light shows common quantitative patterns of gene expression directed by environmentally specific sensing *Plant J.* **51**, 60-78.
